# Supplementary material for: Serum Zinc and Long-Term Prognosis after Acute Traumatic Brain Injury with Intracranial Injury: A Multicenter Prospective Study
Source: MDPI journal article supplement (doi:10.3390/jcm11216496), 2022-11-01
Supplement: s1 [file s1]

**Supplementary Table S1.** Independent predictive performance of serum zinc levels on long- and short-term neurological prognoses of TBI patients with intra-cranial injury.

| Cut-Off Value, Serum Zinc   | Accuracy | Sensitivity | Specificity | PPV    | NPV    |
|-----------------------------|----------|-------------|-------------|--------|--------|
| 6-month mortality           |          |             |             |        |        |
| 80.0mcg/dl                  | 0.7618   | 0.9271      | 0.1456      | 0.8018 | 0.3488 |
| 100.0mcg/dl                 | 0.6489   | 0.7083      | 0.4272      | 0.8218 | 0.2821 |
| 120.0mcg/dl                 | 0.4867   | 0.4271      | 0.7087      | 0.8454 | 0.2491 |
| 6-month disability, GOS 1–3 |          |             |             |        |        |
| 80.0mcg/dl                  | 0.6940   | 0.9300      | 0.1319      | 0.7185 | 0.4419 |
| 100.0mcg/dl                 | 0.6099   | 0.7055      | 0.3819      | 0.7311 | 0.3526 |
| 120.0mcg/dl                 | 0.4928   | 0.4227      | 0.6597      | 0.7474 | 0.3242 |
| 1-month mortality           |          |             |             |        |        |
| 80.0mcg/dl                  | 0.7782   | 0.9286      | 0.1579      | 0.8198 | 0.3488 |
| 100.0mcg/dl                 | 0.6612   | 0.7117      | 0.4526      | 0.8429 | 0.2756 |
| 120.0mcg/dl                 | 0.4784   | 0.4235      | 0.7053      | 0.8557 | 0.2287 |
| 1-month disability, GOS 1–3 |          |             |             |        |        |
| 80.0mcg/dl                  | 0.6858   | 0.9267      | 0.1233      | 0.7117 | 0.4186 |
| 100.0mcg/dl                 | 0.6099   | 0.7067      | 0.3836      | 0.7281 | 0.3590 |
| 120.0mcg/dl                 | 0.4928   | 0.4223      | 0.6575      | 0.7423 | 0.3276 |

PPV, positive predictive value; NPV, negative predictive value.
